# Supplementary material for: Towards Developing Bioresponsive, Self-Assembled Peptide Materials: Dynamic Morphology and Fractal Nature of Nanostructured Matrices
Source: MDPI journal article supplement (doi:10.3390/ma11091539), 2018-08-27
Supplement: s1 [file s1]

# Towards Developing Bioresponsive, Self-Assembled Peptide Materials: Dynamic Morphology and Fractal Nature of Nanostructured Matrices

Kyle Koss and Larry Unsworth

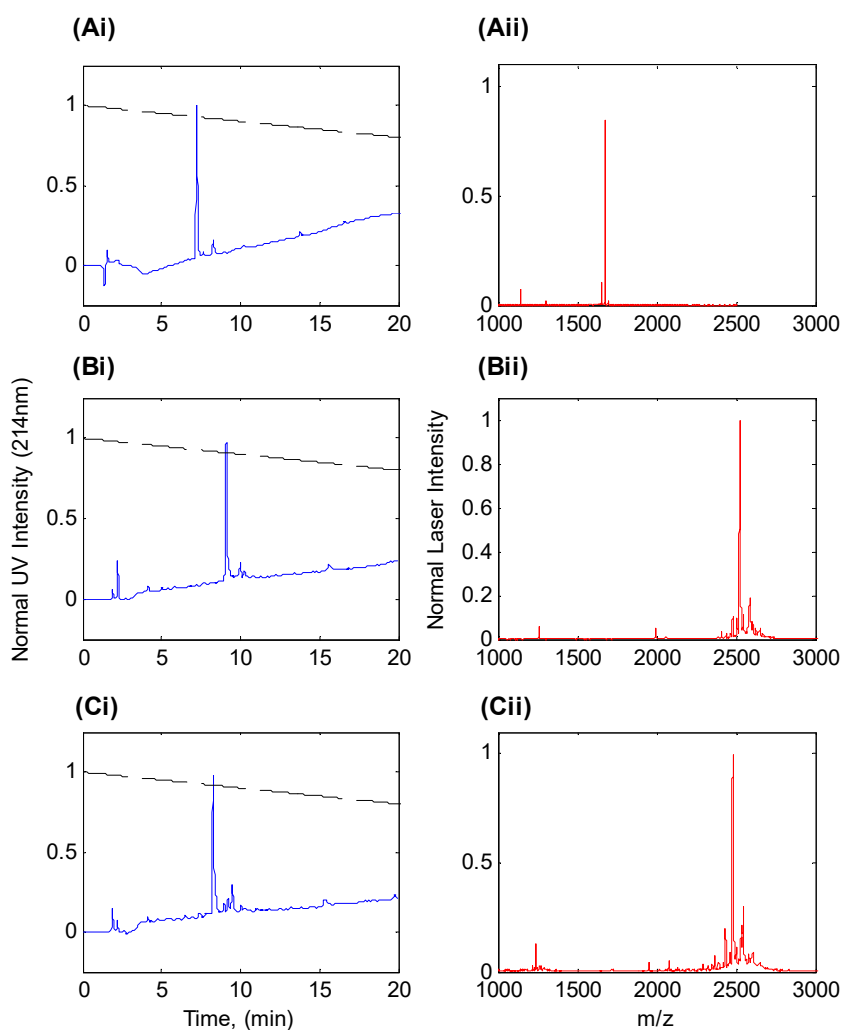

**Figure S1.** Representative (i) HPLC (i) and (ii) MALDI TOF/TOF mass spectrometry (ii) of purified peptide (RADA)<sub>4</sub>, (RADA)<sub>4</sub>-GG-GPQG+IASQ, and (RADA)<sub>4</sub>-GG-GPQG+PAGQ, shown in A, B, and C, respectively. Purities were determined to be above 95% by measuring the comparative areas under the major curve in the HPLC spectra. Major peaks in the MALDI spectra are at 1671.8, 2525.2, and 2478.8 m/z which reflect the theoretical molecular weights. All peaks were normalized to their respective maxima.
